# Supplementary material
Source: MDPI journal article supplement (https://www.mdpi.com/2077-0472/13/6/1189)
Supplement: s1 [file s1]

## Supplementary Materials

### Changes in the bacterial composition of cultivated soil after digging up operations for laying a pipeline

Maria Grazia Bonomo, Laura Scrano, Stefania Mirela Mang, Barbara Emanuela Scalese, Sabino Aurelio Bufo, Lee-Ann Modley, Euro Buongarzone and Giovanni Salzano

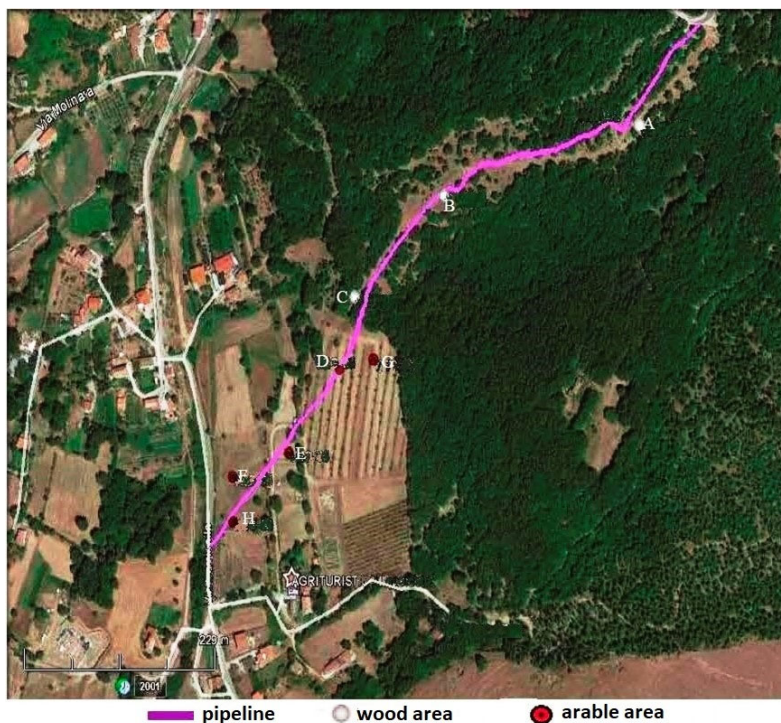

**Figure S1.** Google earth picture of the sampling site.

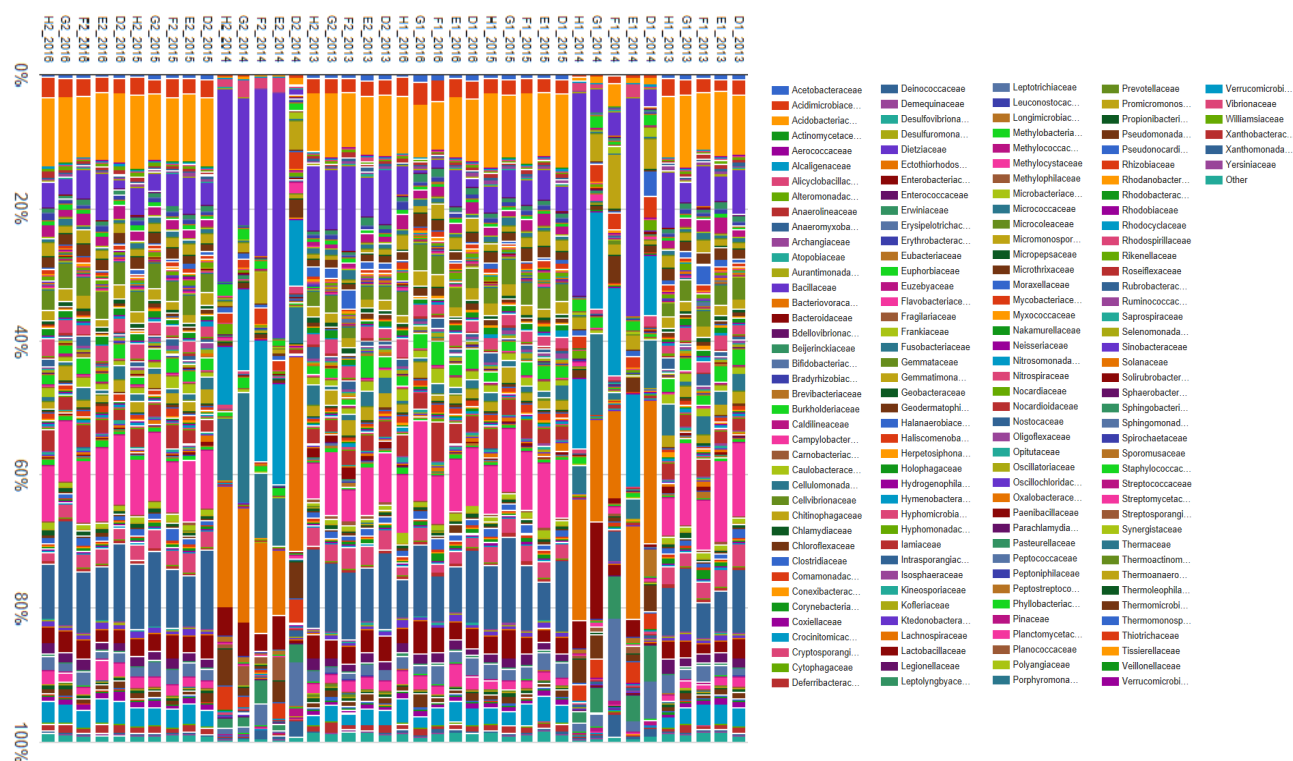

**Figure S2.** Distribution of taxa in soil samples (arable area) at the taxonomic level of the family. The samples are reported in order by sampling sites (DEF, GH), by year (following the chronological order of sampling), and by depth, remarking for each group the sampled sites at 0-20 cm (1) and subsequently those at 20-40 cm (2).

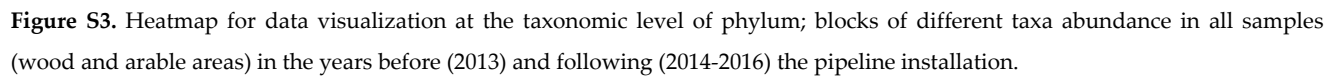

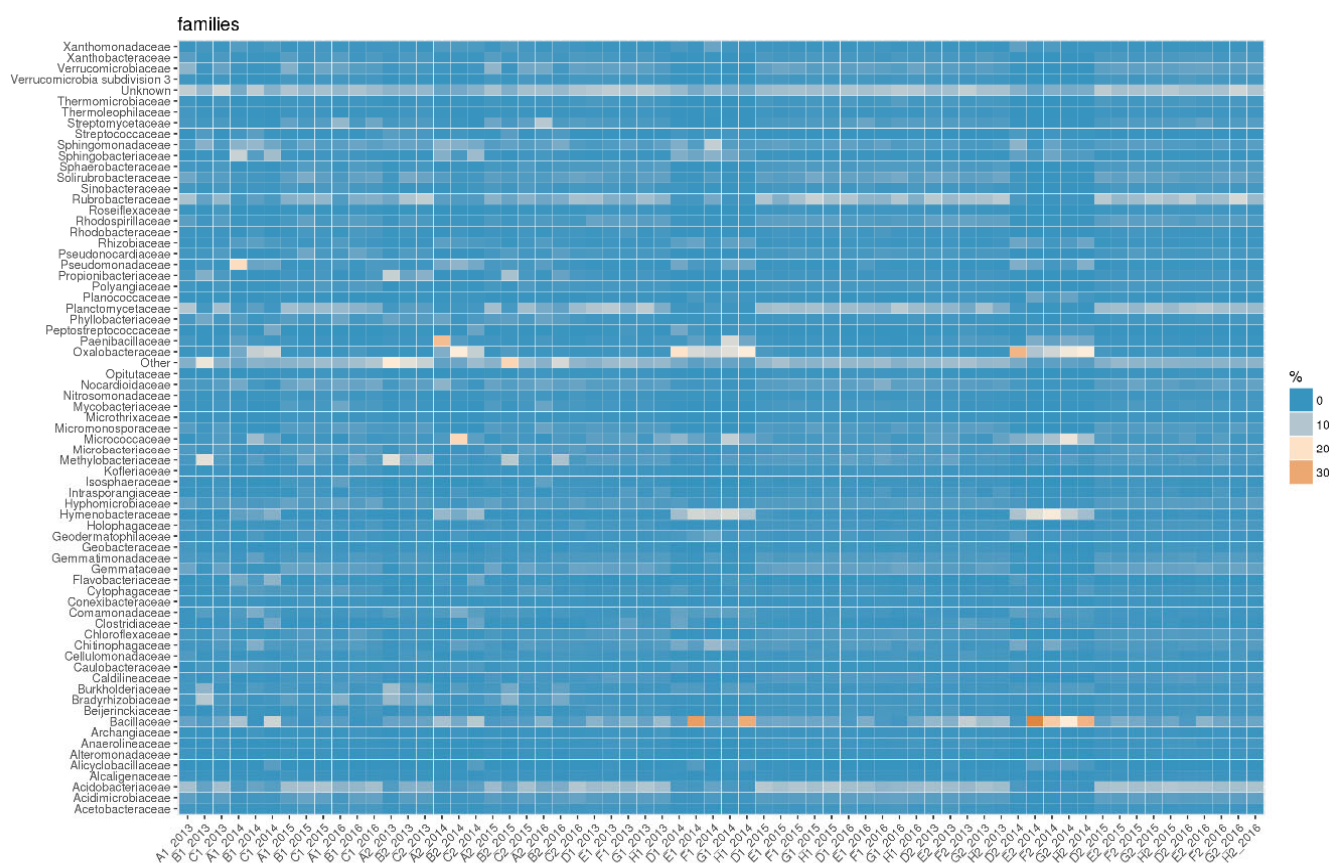

**Figure S4.** Heatmap for data visualization at the taxonomic level of the family; blocks of different taxa abundance in all samples (wood and arable areas) in the years before (2013) and following (2014–2016) the pipeline installation.

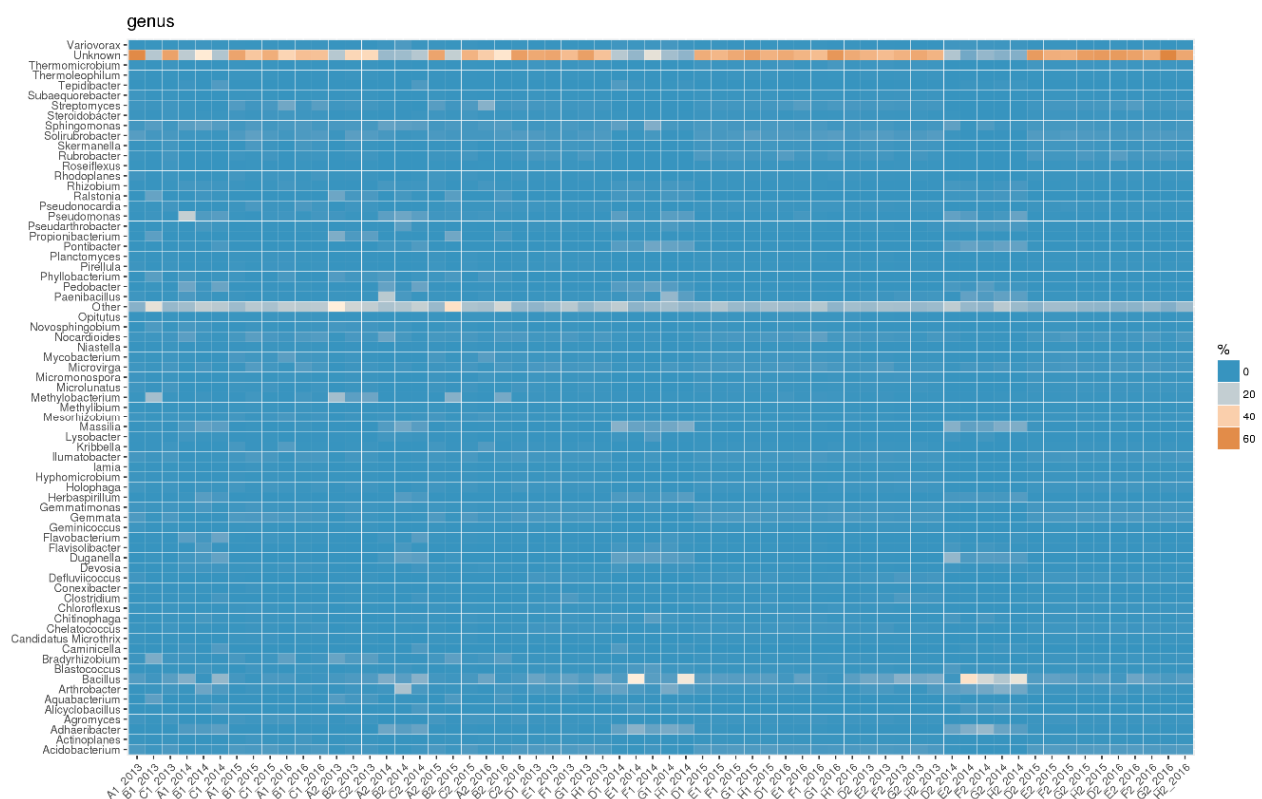

**Figure S5.** Heatmap for data visualization at the genus taxonomic level; blocks of different taxa abundance in all samples (wood and arable areas) in the years before (2013) and following (2014–2016) the pipeline installation.

**Table S1.** Taxa were identified at the phylum taxonomic level in all cultivated soil area samples collected during the three years following the pipeline installation (2014–2016). Taxa with more abundance are reported as over-represented, and those with less abundance are reported as under-represented in comparison to the 2013 (reference year); the abundance was defined as the log FC, the decimal logarithm of the fold-change that represents the times' number that the abundance is significantly modified compared to the reference.

| PHYLA LEVEL              |              |                       |             |                          |              |                       |             |                          |              |                       |             |
|--------------------------|--------------|-----------------------|-------------|--------------------------|--------------|-----------------------|-------------|--------------------------|--------------|-----------------------|-------------|
| 2014                     |              |                       |             | 2015                     |              |                       |             | 2016                     |              |                       |             |
| OTUs under-represented   | logFC        | OTUs over-represented | logFC       | OTUs under-represented   | logFC        | OTUs over-represented | logFC       | OTUs under-represented   | logFC        | OTUs over-represented | logFC       |
| Thaumarchaeota           | -5.246301773 | Arthropoda            | 7.906017092 | Thaumarchaeota           | -5.246301773 | Chlorophyta           | 1.694219779 | Thaumarchaeota           | -5.246301773 | Arthropoda            | 7.906017092 |
| Candidatus Tectomicrobia | -4.802455283 | Chrysiogenetes        | 5.211459679 | Candidatus Tectomicrobia | -4.802455283 | Bacillariophyta       | 1.658326947 | Candidatus Tectomicrobia | -4.802455283 | Chrysiogenetes        | 5.211459679 |
| Chlorophyta              | -4.080042594 | Bacteroidetes         | 4.869019646 | Chlorophyta              | -4.080042594 | Streptophyta          | 1.388272134 | Chlorophyta              | -4.080042594 | Bacteroidetes         | 4.869019646 |
| Euryarchaeota            | -3.864011614 | Firmicutes            | 3.159366156 | Euryarchaeota            | -3.864011614 | Cyanobacteria         | 1.327755731 | Euryarchaeota            | -3.864011614 | Firmicutes            | 3.159366156 |
| Dictyoglomi              | -3.629351485 | Proteobacteria        | 2.409815187 | Dictyoglomi              | -3.629351485 |                       |             | Dictyoglomi              | -3.629351485 | Proteobacteria        | 2.409815187 |
| Nitrospirae              | -3.236839962 | Deinococcus-Thermus   | 2.056877041 | Nitrospirae              | -3.236839962 |                       |             | Nitrospirae              | -3.236839962 | Deinococcus-Thermus   | 2.056877041 |
| Planctomycetes           | -2.882228445 | Tenericutes           | 1.925772133 | Planctomycetes           | -2.882228445 |                       |             | Planctomycetes           | -2.882228445 | Tenericutes           | 1.925772133 |
| Chloroflexi              | -2.807370755 | Fusobacteria          | 1.779600839 | Chloroflexi              | -2.807370755 |                       |             | Chloroflexi              | -2.807370755 | Fusobacteria          | 1.779600839 |
| Verrucomicrobia          | -2.737472389 | Chlorobi              | 1.343358155 | Verrucomicrobia          | -2.737472389 |                       |             | Verrucomicrobia          | -2.737472389 | Chlorobi              | 1.343358155 |
| Nitrospinae              | -2.626796479 | Spirochaetes          | 0.914661665 | Nitrospinae              | -2.626796479 |                       |             | Nitrospinae              | -2.626796479 | Spirochaetes          | 0.914661665 |
| Armatimonadetes          | -2.235253558 | Cyanobacteria         | 0.88723275  | Armatimonadetes          | -2.235253558 |                       |             | Armatimonadetes          | -2.235253558 | Cyanobacteria         | 0.88723275  |
| Chlamydiae               | -2.192720089 | Aquificae             | 0.535664819 | Chlamydiae               | -2.192720089 |                       |             | Chlamydiae               | -2.192720089 | Aquificae             | 0.535664819 |
| Fibrobacteres            | -2.14672731  | Actinobacteria        | 0.45179431  | Fibrobacteres            | -2.14672731  |                       |             | Fibrobacteres            | -2.14672731  | Actinobacteria        | 0.45179431  |
| Bacillariophyta          | -1.893639121 |                       |             | Bacillariophyta          | -1.893639121 |                       |             | Bacillariophyta          | -1.893639121 |                       |             |
| Acidobacteria            | -1.848104355 |                       |             | Acidobacteria            | -1.848104355 |                       |             | Acidobacteria            | -1.848104355 |                       |             |
| Synergistetes            | -1.607824549 |                       |             | Synergistetes            | -1.607824549 |                       |             | Synergistetes            | -1.607824549 |                       |             |
| Thermotogae              | -1.521890478 |                       |             | Thermotogae              | -1.521890478 |                       |             | Thermotogae              | -1.521890478 |                       |             |
| Thermodesulfobacteria    | -1.111003779 |                       |             | Thermodesulfobacteria    | -1.111003779 |                       |             | Thermodesulfobacteria    | -1.111003779 |                       |             |
| Elusimicrobia            | -0.850999508 |                       |             | Elusimicrobia            | -0.850999508 |                       |             | Elusimicrobia            | -0.850999508 |                       |             |

**Table S2.** Taxa were identified at the family taxonomic level in all cultivated soil area samples collected in the three years following the pipeline installation (2014, 2015, 2016). Taxa with more abundance are reported as over-represented, and those with less abundance are reported as under-represented in comparison to the 2013 (reference year); the abundance was defined as the log FC, the decimal logarithm of the fold-change that represents the times' number that the abundance is significantly modified compared to the reference.

## FAMILY LEVEL

| 2014                          |             |                        |            | 2015                          |             |                          |            | 2016                                      |             |                          |            |
|-------------------------------|-------------|------------------------|------------|-------------------------------|-------------|--------------------------|------------|-------------------------------------------|-------------|--------------------------|------------|
| OTUs under-represented        | logFC       | OTUs over-represented  | logFC      | OTUs under-represented        | logFC       | OTUs over-represented    | logFC      | OTUs under-represented                    | logFC       | OTUs over-represented    | logFC      |
| Ktedonobacteraceae            | -5.67745313 | Flatidae               | 7.76578242 | Ktedonobacteraceae            | -5.67745313 | Williamsiaceae           | 4.01955009 | Methanosarcinaceae                        | -5.31935895 | Stephanopyxidaceae       | 5.38043382 |
| Methanosarcinaceae            | -5.44262133 | Hymenobacteraceae      | 7.38339489 | Methanosarcinaceae            | -5.44262133 | Marinifilaceae           | 2.96457849 | Erysipelotrichaceae                       | -4.57562628 | Coccomyxaceae            | 4.90260604 |
| Nitrososphaeraceae            | -5.32871599 | Oxalobacteraceae       | 7.18752404 | Nitrososphaeraceae            | -5.32871599 | Tolypothrichaceae        | 2.96070390 | Defluviitaleaceae                         | -4.39007583 | Fragilariaceae           | 4.52946383 |
| Nostocaceae                   | -4.56828357 | Erwiniaceae            | 6.68868395 | Nostocaceae                   | -4.56828357 | Aeromonadaceae           | 2.95465374 | Prolixibacteraceae                        | -4.19559556 | Williamsiaceae           | 4.33771564 |
| Isosphaeraceae                | -4.46356073 | Leuconostocaceae       | 6.19628286 | Isosphaeraceae                | -4.46356073 | Procabacteriaceae        | 2.94911728 | Peptostreptococcaceae                     | -3.68946772 | Chattonellaceae          | 4.02160377 |
| Roseiflexaceae                | -4.32432687 | Pseudomonadaceae       | 6.11934693 | Roseiflexaceae                | -4.32432687 | Microcoleaceae           | 2.91569484 | Methanomicrobiaceae                       | -3.35860031 | Psilotaceae              | 3.97180420 |
| Bryobacteraceae               | -4.26980877 | Sphingobacteriaceae    | 5.67694324 | Bryobacteraceae               | -4.26980877 | Gomontiellaceae          | 2.86574304 | Alicyclobacillaceae                       | -3.26837245 | Tolypothrichaceae        | 3.83723923 |
| Ferritrophicaceae             | -4.23793450 | Bacteriovoracaceae     | 5.12739743 | Ferritrophicaceae             | -4.23793450 | Methanomassiliicoccaceae | 2.70926163 | Thermoactinomycetaceae                    | -3.26155126 | Rhizosoleniaceae         | 3.62551973 |
| Phycisphaeraceae              | -4.22776437 | Chrysigenaceae         | 5.11287505 | Phycisphaeraceae              | -4.22776437 | Psilotaceae              | 2.61763482 | Symbiobacteriaceae                        | -2.88048028 | Methanomassiliicoccaceae | 3.50568603 |
| Caldicoprobacteraceae         | -4.18822197 | Haliscomenobacteraceae | 5.00249325 | Caldicoprobacteraceae         | -4.18822197 | Fragilariaceae           | 2.43314861 | Limnochordaceae                           | -2.86272884 | Osmundaceae              | 3.48348440 |
| Sphagnaceae                   | -4.18586886 | Gloeobacteraceae       | 4.84284670 | Sphagnaceae                   | -4.18586886 | Sphagnaceae              | 2.37594661 | Christensenellaceae                       | -2.72530159 | Erwiniaceae              | 3.30937089 |
| Microcoleaceae                | -4.09737664 | Alicyclobacillaceae    | 4.81326179 | Microcoleaceae                | -4.09737664 | Pedinomonadaceae         | 2.09603026 | Clostridiaceae                            | -2.72374182 | Budviaceae               | 3.29364593 |
| Anaerolineaceae               | -3.95803400 | Marinifilaceae         | 4.76134959 | Anaerolineaceae               | -3.95803400 | Cellvibrionaceae         | 2.07359064 | Halanaerobiaceae                          | -2.69326827 | Rhabdochlamydiaceae      | 3.09654584 |
| Alteromonadaceae              | -3.93290202 | Rhizobiaceae           | 4.51577167 | Alteromonadaceae              | -3.93290202 | Bacillariaceae           | 1.91300857 | Lachnospiraceae                           | -2.67410514 | Marinifilaceae           | 3.07077724 |
| Thermosporotrichaceae         | -3.77868030 | Streptococcaceae       | 4.47617291 | Thermosporotrichaceae         | -3.77868030 | Saccharospirillaceae     | 1.76994976 | Catabacteriaceae                          | -2.55650515 | Coleochaetaceae          | 3.06162711 |
| Dictyoglomaceae               | -3.74176509 | Flavobacteriaceae      | 4.35733620 | Dictyoglomaceae               | -3.74176509 | Coscinodiscaceae         | 1.48642667 | Tissierellaceae                           | -2.55167934 | Bacillariaceae           | 2.98967704 |
| Symbiobacteriaceae            | -3.63980065 | Bernardetiaceae        | 4.27594649 | Symbiobacteriaceae            | -3.63980065 | Coxiellaceae             | 1.33004998 | Gracilibacteraceae                        | -2.47943139 | Solanaceae               | 2.83497472 |
| Halobacteriaceae              | -3.58178672 | Blattabacteriaceae     | 4.22426817 | Halobacteriaceae              | -3.58178672 | Bdellovibrionaceae       | 0.98520390 | Sporomusaceae                             | -2.44106395 | Spirulinaceae            | 2.82408396 |
| Fragilariaceae                | -3.55799454 | Enterobacteriaceae     | 4.15991448 | Fragilariaceae                | -3.55799454 | Hymenobacteraceae        | 0.98445737 | Paenibacillaceae                          | -2.42108568 | Microcoleaceae           | 2.80554994 |
| Sphaerobacteraceae            | -3.50581327 | Paenibacillaceae       | 4.01480835 | Sphaerobacteraceae            | -3.50581327 | Bacteriovoracaceae       | 0.98243685 | Ruminococcaceae                           | -2.39603961 | Cryptomonadaceae         | 2.78311748 |
| Anaeromyxobacteraceae         | -3.48395979 | Xanthomonadaceae       | 3.89235930 | Anaeromyxobacteraceae         | -3.48395979 | Mycobacteriaceae         | 0.86143516 | Clostridiales Family XIII. Incertae Sedis | -2.23523981 | Eupodiscaceae            | 2.68623752 |
| Thermomicrobiaceae            | -3.45966028 | Thermonemataceae       | 3.78414324 | Thermomicrobiaceae            | -3.45966028 | Tsukamurellaceae         | 0.74932255 | Syntrophomonadaceae                       | -2.11718618 | Fabaceae                 | 2.66817000 |
| Nakamurellaceae               | -3.41477526 | Salinisphaeraceae      | 3.74300672 | Nakamurellaceae               | -3.41477526 | Rhodanobacteraceae       | 0.71654194 | Planococcaceae                            | -2.10168210 | Saccharospirillaceae     | 2.44924840 |
| Nitrospiraceae                | -3.30250817 | Gallionellaceae        | 3.68695066 | Nitrospiraceae                | -3.30250817 | Xanthomonadaceae         | 0.65687181 | Caldicoprobacteraceae                     | -2.08003555 | Marsupiomnadaceae        | 2.40298751 |
| Caldilineaceae                | -3.24559076 | Comamonadaceae         | 3.66293245 | Caldilineaceae                | -3.24559076 | Rhodobiaceae             | 0.51152872 | Peptococcaceae                            | -2.00121007 | Hydrodictyaceae          | 2.39901611 |
| Parachlamydiaceae             | -3.20139726 | Saccharospirillaceae   | 3.63085555 | Parachlamydiaceae             | -3.20139726 | Kofleriaceae             | 0.50841064 | Glycomycetaceae                           | -1.98310888 | Ferrovaceae              | 2.36116396 |
| Bacillariaceae                | -3.20135641 | Spirillaceae           | 3.62891151 | Bacillariaceae                | -3.20135641 | Alcaligenaceae           | 0.50678895 | Carnobacteriaceae                         | -1.90011464 | Aeromonadaceae           | 2.33008415 |
| Verrucomicrobia subdivision 3 | -3.18555160 | Hafniaceae             | 3.59614240 | Verrucomicrobia subdivision 3 | -3.18555160 | Streptococcaceae         | 0.42319004 | Sporolactobacillaceae                     | -1.86154581 | Coscinodiscaceae         | 2.30614838 |

|                        |             |                       |            |                        |             |               |            |                                          |             |                        |            |
|------------------------|-------------|-----------------------|------------|------------------------|-------------|---------------|------------|------------------------------------------|-------------|------------------------|------------|
| Syntrophomonadaceae    | -3.18524639 | Planococcaceae        | 3.58739671 | Syntrophomonadaceae    | -3.18524639 | Polyangiaceae | 0.24543152 | Pasteuriaceae                            | -1.73815894 | Oscillatoriaceae       | 2.28853040 |
| Limnochordaceae        | -3.11016522 | Caulobacteraceae      | 3.56142798 | Limnochordaceae        | -3.11016522 |               |            | Proteinivoraceae                         | -1.50700072 | Yersiniaceae           | 2.27841071 |
| Planctomycetaceae      | -3.10754247 | Micrococcaceae        | 3.53688746 | Planctomycetaceae      | -3.10754247 |               |            | Selenomonadaceae                         | -1.50649496 | Hafniaceae             | 2.14101806 |
| Skeletonemataceae      | -3.10696431 | Lewinellaceae         | 3.53507011 | Skeletonemataceae      | -3.10696431 |               |            | Veillonellaceae                          | -1.50253717 | Chlorodendraceae       | 2.14018501 |
| Methylacidiphilaceae   | -3.10296088 | Pelagibacteraceae     | 3.52359858 | Methylacidiphilaceae   | -3.10296088 |               |            | Peptoniphilaceae                         | -1.49857967 | Sphagnaceae            | 2.08850302 |
| Catabacteriaceae       | -3.08665594 | Coxiellaceae          | 3.37395102 | Catabacteriaceae       | -3.08665594 |               |            | Natranaerobiaceae                        | -1.40193707 | Pedinomonadaceae       | 1.96875682 |
| Micromonosporaceae     | -3.06998039 | Bacillaceae           | 3.34210402 | Micromonosporaceae     | -3.06998039 |               |            | Desulfovibrionaceae                      | -1.34611803 | Chroomonadaceae        | 1.95205548 |
| Thermoactinomycetaceae | -3.03179398 | Moraxellaceae         | 3.31163562 | Thermoactinomycetaceae | -3.03179398 |               |            | Deferribacteraceae                       | -1.33505309 | Cryomorphaceae         | 1.90027074 |
| Nannocystaceae         | -2.97083909 | Microscillaceae       | 3.28160234 | Nannocystaceae         | -2.97083909 |               |            | Clostridiales Family XII. Incertae Sedis | -1.20595276 | Coxiellaceae           | 1.89654267 |
| Nitrospinaceae         | -2.96199400 | Spiroplasmataceae     | 3.25697567 | Nitrospinaceae         | -2.96199400 |               |            | Eubacteriaceae                           | -1.18499417 | Cellvibrionaceae       | 1.74615741 |
| Dehalococcoidaceae     | -2.95502042 | Ferrovaceae           | 3.24167241 | Dehalococcoidaceae     | -2.95502042 |               |            | Spirochaetaceae                          | -1.18307685 | Haliscomenobacteraceae | 1.64706914 |
| Erysipelotrichaceae    | -2.93524756 | Carnobacteriaceae     | 3.18119280 | Erysipelotrichaceae    | -2.93524756 |               |            | Bacillaceae                              | -1.16748553 | Crocinitomicaceae      | 1.64275691 |
| Pseudonocardiaceae     | -2.90751778 | Burkholderiaceae      | 3.15156525 | Pseudonocardiaceae     | -2.90751778 |               |            | Staphylococcaceae                        | -1.14879961 | Skeletonemataceae      | 1.62643143 |
| Syntrophobacteraceae   | -2.90696050 | Cellvibrionaceae      | 3.12002312 | Syntrophobacteraceae   | -2.90696050 |               |            | Anaeromyxobacteraceae                    | -1.14854420 | Haliaceae              | 1.60674561 |
| Aphanizomenonaceae     | -2.88561826 | Peptostreptococcaceae | 3.10291319 | Aphanizomenonaceae     | -2.88561826 |               |            | Desulfohalobaceae                        | -1.13977624 | Oleiphilaceae          | 1.49671742 |
| Actinospicaceae        | -2.86252695 | Chitinophagaceae      | 3.08378222 | Actinospicaceae        | -2.86252695 |               |            | Syntrophobacteraceae                     | -1.03173183 | Pseudomonadaceae       | 1.43046964 |
| Leptolyngbyaceae       | -2.85681994 | Bdellovibrionaceae    | 3.06679976 | Leptolyngbyaceae       | -2.85681994 |               |            | Vibrionaceae                             | -1.01500472 | Aurantimonadaceae      | 1.39260060 |
| Verrucomicrobiaceae    | -2.85137777 | Nautiliaceae          | 3.06153199 | Verrucomicrobiaceae    | -2.85137777 |               |            | Amoebophilaceae                          | -0.96514819 | Enterobacteriaceae     | 1.38222039 |
| Symphyonemataceae      | -2.84666397 | Lactobacillaceae      | 3.03140517 | Symphyonemataceae      | -2.84666397 |               |            | Fusobacteriaceae                         | -0.93690835 | Nocardiaceae           | 1.23706386 |
| Tissierellaceae        | -2.71001416 | Holospiraceae         | 3.02847238 | Tissierellaceae        | -2.71001416 |               |            | Solibacteraceae                          | -0.93332625 | Saprospiraceae         | 1.12781973 |
| Defluviitaleaceae      | -2.69112120 | Francisellaceae       | 3.02816441 | Defluviitaleaceae      | -2.69112120 |               |            | Nocardiopsaceae                          | -0.92656799 | Flavobacteriaceae      | 1.11413256 |
| Halanaerobiaceae       | -2.68910720 | Microcystaceae        | 2.98349296 | Halanaerobiaceae       | -2.68910720 |               |            | Pasteurellaceae                          | -0.91948669 | Bacteriovoracaceae     | 1.09471151 |
| Prolixibacteraceae     | -2.68324147 | Deinococcaceae        | 2.89544721 | Prolixibacteraceae     | -2.68324147 |               |            | Micrococcaceae                           | -0.90405821 | Tsukamurellaceae       | 1.08685528 |
| Euzebyaceae            | -2.67674888 | Aurantimonadaceae     | 2.88463964 | Euzebyaceae            | -2.67674888 |               |            | Streptosporangiaceae                     | -0.89739544 | Opitutaceae            | 1.07185497 |
| Methanomicrobiaceae    | -2.67492753 | Dietziaceae           | 2.71737041 | Methanomicrobiaceae    | -2.67492753 |               |            | Nitrospiraceae                           | -0.84356731 | Mycobacteriaceae       | 1.05027631 |
| Ectothiorhodospiraceae | -2.65079089 | Geodermatophilaceae   | 2.62195731 | Ectothiorhodospiraceae | -2.65079089 |               |            | Coriobacteriaceae                        | -0.80400928 | Alcanivoracaceae       | 1.03265593 |
| Sporomusaceae          | -2.62434262 | Peptoniphilaceae      | 2.56700080 | Sporomusaceae          | -2.62434262 |               |            | Thermoanaerobacteraceae                  | -0.78699607 | Streptococcaceae       | 0.95833515 |
| Pedinomonadaceae       | -2.60620601 | Succinivibrionaceae   | 2.53349360 | Pedinomonadaceae       | -2.60620601 |               |            | Methylococcaceae                         | -0.74039180 | Rhodanobacteraceae     | 0.92526458 |

|                                                         |             |                                              |            |                                                      |             |  |  |                     |             |                                  |            |
|---------------------------------------------------------|-------------|----------------------------------------------|------------|------------------------------------------------------|-------------|--|--|---------------------|-------------|----------------------------------|------------|
| Acidothermaceae                                         | -2.60072278 | Coleofasciculaceae                           | 2.49792084 | Acidothermaceae                                      | -2.60072278 |  |  | Rickettsiaceae      | -0.68670236 | Xanthomonadaceae                 | 0.89655994 |
| Streptosporangiaceae                                    | -2.55798714 | Sporolactobacillaceae                        | 2.46114919 | Streptosporangiaceae                                 | -2.55798714 |  |  | Bifidobacteriaceae  | -0.66808222 | Marinilabiliaceae                | 0.82817780 |
| Nocardiopeceae                                          | -2.52225945 | Pectobacteriaceae                            | 2.44207059 | Nocardiopeceae                                       | -2.52225945 |  |  | Eggerthellaceae     | -0.62681822 | Syntrophaceae                    | 0.82109719 |
| Streptomycetaceae                                       | -2.51011721 | Sulfuricellaceae                             | 2.43616681 | Streptomycetaceae                                    | -2.51011721 |  |  | Anaplasmataceae     | -0.60482501 | Chitinophagaceae                 | 0.79957352 |
| Microthrixaceae                                         | -2.50955550 | Brucellaceae                                 | 2.38308897 | Microthrixaceae                                      | -2.50955550 |  |  | Desulfuromonadaceae | -0.59847378 | Sphingobacteriaceae              | 0.78035668 |
| Geobacteraceae                                          | -2.47673303 | Sphingomonadaceae                            | 2.37363918 | Geobacteraceae                                       | -2.47673303 |  |  | Rhodospirillaceae   | -0.58544202 | Bdellovibrionaceae               | 0.75094070 |
| Gemmataceae                                             | -2.46396195 | Clostridiales Family XII.<br>Incertae Sedis  | 2.34438602 | Gemmataceae                                          | -2.46396195 |  |  | Actinomycetaceae    | -0.44754521 | Cytophagaceae                    | 0.71030918 |
| Chthonomonadaceae                                       | -2.42138407 | Sutterellaceae                               | 2.33330848 | Chthonomonadaceae                                    | -2.42138407 |  |  |                     |             | Streptomycetaceae                | 0.70346092 |
| Fibrobacteraceae                                        | -2.41641796 | Colwelliaceae                                | 2.33092945 | Fibrobacteraceae                                     | -2.41641796 |  |  |                     |             | Micropepsaceae                   | 0.68761417 |
| Gracilibacteraceae                                      | -2.33667880 | Brevinemataceae                              | 2.32490873 | Gracilibacteraceae                                   | -2.33667880 |  |  |                     |             | Flammeovirgaceae                 | 0.66433495 |
| Solibacteraceae                                         | -2.29750099 | Cytophagaceae                                | 2.31113175 | Solibacteraceae                                      | -2.29750099 |  |  |                     |             | Kofleriaceae                     | 0.65143113 |
| Chloroflexaceae                                         | -2.28934544 | Rikenellaceae                                | 2.30219286 | Chloroflexaceae                                      | -2.28934544 |  |  |                     |             | Legionellaceae                   | 0.64298519 |
| Thermomonosporaceae                                     | -2.26702361 | Morganellaceae                               | 2.27391185 | Thermomonosporaceae                                  | -2.26702361 |  |  |                     |             | Verrucomicrobia<br>subdivision 3 | 0.59165552 |
| Xanthobacteraceae                                       | -2.25283561 | Prevotellaceae                               | 2.25732617 | Xanthobacteraceae                                    | -2.25283561 |  |  |                     |             | Rhodobiaceae                     | 0.58624837 |
| Opitutaceae                                             | -2.20643799 | Acholeplasmataceae                           | 2.24636097 | Opitutaceae                                          | -2.20643799 |  |  |                     |             | Caldilineaceae                   | 0.57158509 |
| Frankiaceae                                             | -2.18882628 | Mycoplasmataceae                             | 2.23900101 | Frankiaceae                                          | -2.18882628 |  |  |                     |             | Alcaligenaceae                   | 0.53941169 |
| Coriobacteriaceae                                       | -2.16558129 | Clostridiales Family XIII.<br>Incertae Sedis | 2.21725001 | Coriobacteriaceae                                    | -2.16558129 |  |  |                     |             | Gemmataceae                      | 0.51721228 |
| Haliaceae                                               | -2.14721626 | Legionellaceae                               | 2.21086924 | Haliaceae                                            | -2.14721626 |  |  |                     |             | Phyllobacteriaceae               | 0.48772819 |
| Thermoanaerobacterales<br>Family III. Incertae<br>Sedis | -2.11155189 | Chromobacteriaceae                           | 2.20837481 | Thermoanaerobacterales<br>Family III. Incertae Sedis | -2.11155189 |  |  |                     |             | Nocardioideaceae                 | 0.45717254 |
| Jiangellaceae                                           | -2.09859541 | Kordiimonadaceae                             | 2.20535701 | Jiangellaceae                                        | -2.09859541 |  |  |                     |             | Acidimicrobiaceae                | 0.44951922 |
| Oscillochloridaceae                                     | -2.09387239 | Bacillales Family X.<br>Incertae Sedis       | 2.19217114 | Oscillochloridaceae                                  | -2.09387239 |  |  |                     |             | Bradyrhizobiaceae                | 0.44735454 |
| Thermoleophilaceae                                      | -2.09031284 | Cyclobacteriaceae                            | 2.12772692 | Thermoleophilaceae                                   | -2.09031284 |  |  |                     |             | Nitrosomonadaceae                | 0.39296275 |
| Glycomycetaceae                                         | -2.07081809 | Aerococcaceae                                | 2.12689459 | Glycomycetaceae                                      | -2.07081809 |  |  |                     |             | Burkholderiaceae                 | 0.39082058 |
| Proteinivoraceae                                        | -2.06166055 | Yersiniaceae                                 | 2.09222584 | Proteinivoraceae                                     | -2.06166055 |  |  |                     |             | Chloroflexaceae                  | 0.37964056 |
| Fervidobacteriaceae                                     | -2.03464581 | Corynebacteriaceae                           | 2.08653461 | Fervidobacteriaceae                                  | -2.03464581 |  |  |                     |             | Polyangiaceae                    | 0.27886772 |
| Atopobiaceae                                            | -2.01334894 | Shewanellaceae                               | 2.08514772 | Atopobiaceae                                         | -2.01334894 |  |  |                     |             |                                  |            |
| Methylococcaceae                                        | -2.01263402 | Leptotrichiaceae                             | 2.05132180 | Methylococcaceae                                     | -2.01263402 |  |  |                     |             |                                  |            |

|                         |             |                               |            |                         |             |  |  |  |  |  |  |
|-------------------------|-------------|-------------------------------|------------|-------------------------|-------------|--|--|--|--|--|--|
| Rubrobacteraceae        | -1.96000736 | Pseudoalteromonadaceae        | 2.01819354 | Rubrobacteraceae        | -1.96000736 |  |  |  |  |  |  |
| Chlamydiaceae           | -1.93702817 | Enterococcaceae               | 1.99125797 | Chlamydiaceae           | -1.93702817 |  |  |  |  |  |  |
| Acidobacteriaceae       | -1.92675589 | Listeriaceae                  | 1.97858861 | Acidobacteriaceae       | -1.92675589 |  |  |  |  |  |  |
| Phaselicystidaceae      | -1.90446945 | Neisseriaceae                 | 1.91842247 | Phaselicystidaceae      | -1.90446945 |  |  |  |  |  |  |
| Thermotogaceae          | -1.88721594 | Candidatus<br>Midichloriaceae | 1.83259270 | Thermotogaceae          | -1.88721594 |  |  |  |  |  |  |
| Catenulisporaceae       | -1.86823604 | Amoebophilaceae               | 1.82377018 | Catenulisporaceae       | -1.86823604 |  |  |  |  |  |  |
| Propionibacteriaceae    | -1.84788449 | Staphylococcaceae             | 1.82131441 | Propionibacteriaceae    | -1.84788449 |  |  |  |  |  |  |
| Rhodospirillaceae       | -1.84742620 | Oceanospirillaceae            | 1.81976511 | Rhodospirillaceae       | -1.84742620 |  |  |  |  |  |  |
| Herpetosiphonaceae      | -1.84018338 | Hydrogenophilaceae            | 1.79751167 | Herpetosiphonaceae      | -1.84018338 |  |  |  |  |  |  |
| Endomicrobiaceae        | -1.81765751 | Porphyromonadaceae            | 1.79465903 | Endomicrobiaceae        | -1.81765751 |  |  |  |  |  |  |
| Methylocystaceae        | -1.80270868 | Idiomarinaceae                | 1.72635277 | Methylocystaceae        | -1.80270868 |  |  |  |  |  |  |
| Eggerthellaceae         | -1.80006110 | Bartonellaceae                | 1.70407226 | Eggerthellaceae         | -1.80006110 |  |  |  |  |  |  |
| Natronaerobiaceae       | -1.78446468 | Fusobacteriaceae              | 1.65502896 | Natronaerobiaceae       | -1.78446468 |  |  |  |  |  |  |
| Polyangiaceae           | -1.74982144 | Selenomonadaceae              | 1.61251596 | Polyangiaceae           | -1.74982144 |  |  |  |  |  |  |
| Acetobacteraceae        | -1.71243890 | Oscillatoriaceae              | 1.59270684 | Acetobacteraceae        | -1.71243890 |  |  |  |  |  |  |
| Promicromonosporaceae   | -1.68491534 | Gordoniaceae                  | 1.49481737 | Promicromonosporaceae   | -1.68491534 |  |  |  |  |  |  |
| Holophagaceae           | -1.64577497 | Oscillospiraceae              | 1.42166431 | Holophagaceae           | -1.64577497 |  |  |  |  |  |  |
| Solirubrobacteraceae    | -1.58410270 | Erythrobacteraceae            | 1.39462321 | Solirubrobacteraceae    | -1.58410270 |  |  |  |  |  |  |
| Demequinaceae           | -1.51587393 | Anaplasmataceae               | 1.33282779 | Demequinaceae           | -1.51587393 |  |  |  |  |  |  |
| Desulfuromonadaceae     | -1.49409021 | Piscirickettsiaceae           | 1.33266024 | Desulfuromonadaceae     | -1.49409021 |  |  |  |  |  |  |
| Iamiaceae               | -1.49155615 | Rickettsiaceae                | 1.31844354 | Iamiaceae               | -1.49155615 |  |  |  |  |  |  |
| Solanaceae              | -1.48374210 | Rhodanobacteraceae            | 1.30523165 | Solanaceae              | -1.48374210 |  |  |  |  |  |  |
| Kofleriaceae            | -1.43915616 | Rhodothermaceae               | 1.30064279 | Kofleriaceae            | -1.43915616 |  |  |  |  |  |  |
| Lachnospiraceae         | -1.35192022 | Methylophilaceae              | 1.26245936 | Lachnospiraceae         | -1.35192022 |  |  |  |  |  |  |
| Patulibacteraceae       | -1.32257929 | Crocinitomicaceae             | 1.17630721 | Patulibacteraceae       | -1.32257929 |  |  |  |  |  |  |
| Ruminococcaceae         | -1.31007648 | Oligoflexaceae                | 1.12332254 | Ruminococcaceae         | -1.31007648 |  |  |  |  |  |  |
| Thermoanaerobacteraceae | -1.29291655 | Campylobacteraceae            | 1.10085072 | Thermoanaerobacteraceae | -1.29291655 |  |  |  |  |  |  |

|                           |             |                     |            |                           |             |  |  |  |  |  |  |
|---------------------------|-------------|---------------------|------------|---------------------------|-------------|--|--|--|--|--|--|
| Rhodobacteraceae          | -1.28318200 | Marinilabiliaceae   | 1.08196297 | Rhodobacteraceae          | -1.28318200 |  |  |  |  |  |  |
| Desulfovibrionaceae       | -1.27364265 | Bifidobacteriaceae  | 1.06173795 | Desulfovibrionaceae       | -1.27364265 |  |  |  |  |  |  |
| Thermodesulfobiaceae      | -1.26599853 | Sanguibacteraceae   | 1.03904751 | Thermodesulfobiaceae      | -1.26599853 |  |  |  |  |  |  |
| Syntrophaceae             | -1.26351223 | Halomonadaceae      | 1.03772451 | Syntrophaceae             | -1.26351223 |  |  |  |  |  |  |
| Nocardiaceae              | -1.22659474 | Rhodocyclaceae      | 1.03281903 | Nocardiaceae              | -1.22659474 |  |  |  |  |  |  |
| Micropepsaceae            | -1.19447879 | Clostridiaceae      | 1.02003134 | Micropepsaceae            | -1.19447879 |  |  |  |  |  |  |
| Christensenellaceae       | -1.17500234 | Vibrionaceae        | 0.92236468 | Christensenellaceae       | -1.17500234 |  |  |  |  |  |  |
| Synergistaceae            | -1.14279030 | Saprospiraceae      | 0.90766458 | Synergistaceae            | -1.14279030 |  |  |  |  |  |  |
| Mycobacteriaceae          | -1.08362391 | Methylobacteriaceae | 0.84578386 | Mycobacteriaceae          | -1.08362391 |  |  |  |  |  |  |
| Cellulomonadaceae         | -1.07919701 | Kiloniellaceae      | 0.84565478 | Cellulomonadaceae         | -1.07919701 |  |  |  |  |  |  |
| Acidimicrobiaceae         | -1.07021613 | Helicobacteraceae   | 0.82873719 | Acidimicrobiaceae         | -1.07021613 |  |  |  |  |  |  |
| Syntrophorhabdaceae       | -1.04053432 | Flammeovirgaceae    | 0.80633445 | Syntrophorhabdaceae       | -1.04053432 |  |  |  |  |  |  |
| Heliobacteriaceae         | -1.02647674 | Hydrogenothermaceae | 0.69581527 | Heliobacteriaceae         | -1.02647674 |  |  |  |  |  |  |
| Peptococcaceae            | -0.97436149 | Actinomycetaceae    | 0.60991335 | Peptococcaceae            | -0.97436149 |  |  |  |  |  |  |
| Brevibacteriaceae         | -0.96188256 |                     |            | Brevibacteriaceae         | -0.96188256 |  |  |  |  |  |  |
| Sporichthyaceae           | -0.92905330 |                     |            | Sporichthyaceae           | -0.92905330 |  |  |  |  |  |  |
| Tsukamurellaceae          | -0.92222812 |                     |            | Tsukamurellaceae          | -0.92222812 |  |  |  |  |  |  |
| Desulfobulbaceae          | -0.91249498 |                     |            | Desulfobulbaceae          | -0.91249498 |  |  |  |  |  |  |
| Sinobacteraceae           | -0.91176299 |                     |            | Sinobacteraceae           | -0.91176299 |  |  |  |  |  |  |
| Rhodobiaceae              | -0.80795251 |                     |            | Rhodobiaceae              | -0.80795251 |  |  |  |  |  |  |
| Nocardiodaceae            | -0.77848134 |                     |            | Nocardiodaceae            | -0.77848134 |  |  |  |  |  |  |
| Thermodesulfobacteriaceae | -0.75744565 |                     |            | Thermodesulfobacteriaceae | -0.75744565 |  |  |  |  |  |  |
| Intrasporangiaceae        | -0.73255817 |                     |            | Intrasporangiaceae        | -0.73255817 |  |  |  |  |  |  |
| Desulfobacteraceae        | -0.69435711 |                     |            | Desulfobacteraceae        | -0.69435711 |  |  |  |  |  |  |
| Veillonellaceae           | -0.67923085 |                     |            | Veillonellaceae           | -0.67923085 |  |  |  |  |  |  |
| Thiotrichaceae            | -0.67213928 |                     |            | Thiotrichaceae            | -0.67213928 |  |  |  |  |  |  |
| Beijerinckiaceae          | -0.56144362 |                     |            | Beijerinckiaceae          | -0.56144362 |  |  |  |  |  |  |

**Table S3.** Ranges of chemical, physical-chemical and biological properties of collected samples.

|                              | Year                        | Arable area     |             |             |             | Wood area   |             |             |             |
|------------------------------|-----------------------------|-----------------|-------------|-------------|-------------|-------------|-------------|-------------|-------------|
|                              |                             | 2013            | 2014        | 2015        | 2016        | 2013        | 2014        | 2015        | 2016        |
| Soil parameters              | Unit                        | Surficial layer |             |             |             |             |             |             |             |
| pH                           | ---                         | 7.8 - 7.9       | 8.2 - 8.8   | 8.0 - 8.3   | 7.8 - 8.1   | 7.8 - 8.9   | 7.6 - 8.7   | 7.7 - 8.1   | 7.3 - 8.2   |
| Electrical conductivity      | µS/cm                       | 29 - 81         | 21 - 56     | 177 - 249   | 126 - 257   | 77 - 88     | 53 - 65     | 227 - 264   | 154 - 306   |
| Organic carbon               | g/kg                        | 10.9 - 32.8     | 15.4 - 24.0 | 14.6 - 18.1 | 16.2 - 25.6 | 2.7 - 21.5  | 16.4 - 36.1 | 12.9 - 64.0 | 4.5 - 33.7  |
| Total carbonate              | g/kg                        | 13.4 - 35.7     | 15.6 - 40.4 | 12.1 - 44.5 | 10.1 - 22.3 | 71.5 - 121  | 8.9 - 116   | 16.2 - 56.6 | 8.1 - 70.8  |
| Exchangeable Ca              | g/kg                        | 6.3 - 23.8      | 17.5 - 18.9 | 18.8 - 35.0 | 21.3 - 36.3 | 36.3 - 67.5 | 15.9 - 18.5 | 13.7 - 28.7 | 6.3 - 38.8  |
| Total-N                      | g/kg                        | 1.4 - 2.4       | 1.0 - 1.5   | 0.04 - 0.56 | 0.05 - 0.16 | 0.50 - 3.2  | 1.29 - 2.30 | 0.56 - 0.70 | 0.28 - 0.63 |
| Cation Exchange Capacity     | cmol+/kg                    | 25 - 39         | 31 - 51     | 33 - 49     | 33 - 39     | 17 - 36     | 22 - 41     | 21 - 41     | 22 - 28     |
| Phosphorus content           | mg/kg                       | 3.3 - 40        | 22 - 41     | 37 - 79     | 33 - 77     | 3.0 - 53    | 31 - 131    | 21 - 220    | 27 - 209    |
| Basal respiration            | mg C-CO <sub>2</sub> /kg dm | 126 - 219       | 90 - 108    | 90 - 195    | 135 - 1020  | 78 - 144    | 102 - 142   | 141 - 318   | 153 - 522   |
| Cumulative respiration       | mg C-CO <sub>2</sub> /kg dm | 426 - 566       | 393 - 596   | 201 - 432   | 159 - 1822  | 232 - 405   | 551 - 707   | 672 - 1104  | 990 - 1359  |
| Microbial biomass            | mgC/kg dm                   | 72 - 331        | 200 - 400   | 120 - 380   | 300 - 400   | 98 - 143    | 240 - 400   | 120 - 480   | 360 - 400   |
| Soil parameters              | Unit                        | Deep layer      |             |             |             |             |             |             |             |
| pH                           | ---                         | 7.8 - 8.0       | 8.4 - 8.9   | 8.1 - 8.2   | 7.9 - 8.4   | 7.9 - 8.7   | 7.9 - 8.7   | 7.9 - 8.4   | 8.0 - 8.5   |
| Electrical conductivity      | µS/cm                       | 37 - 85         | 23.4 - 69.2 | 184 - 238   | 111 - 213   | 63 - 76     | 38 - 93     | 184 - 270   | 151 - 356   |
| Organic carbon               | g/kg                        | 8.2 - 22.4      | 10.1 - 19.7 | 14.4 - 19.9 | 11.3 - 29.8 | 5.1 - 8.8   | 10.7 - 30.4 | 7.4 - 45.2  | 5.3 - 23.0  |
| Total carbonate              | g/kg                        | 17.9 - 49.1     | 13.4 - 44.7 | 10.1 - 44.5 | 12.1 - 48.4 | 44.7 - 112  | 22.3 - 98.2 | 44.5 - 62.7 | 12.1 - 107  |
| Exchangeable Ca              | g/kg                        | 2.5 - 27.5      | 17.4 - 18.7 | 12.5 - 32.5 | 31.3 - 43.8 | 41.3 - 71.3 | 15.6 - 18.3 | 25.0 - 27.5 | 10.0 - 43.8 |
| Total-N                      | g/kg                        | 1.0 - 2.5       | 0.70 - 1.30 | 0.06 - 0.08 | 0.05 - 0.08 | 0.50 - 2.0  | 1.0 - 1.3   | 0.56 - 0.69 | 0.35 - 1.06 |
| Cation Exchangeable Capacity | cmol+/kg                    | 29 - 35         | 31 - 40     | 30 - 38     | 34 - 35     | 17 - 23     | 25 - 37     | 24 - 37     | 20 - 25     |
| Phosphorus content           | mg/kg                       | 3.0 - 31        | 17 - 36     | 34 - 82     | 36 - 86     | 1.3 - 13    | 32 - 68     | 53 - 138    | 58 - 128    |
| Basal respiration            | mg C-CO <sub>2</sub> /kg dm | 111 - 240       | 90 - 108    | 93 - 222    | 144 - 894   | 63 - 78     | 108 - 114   | 105 - 273   | 108 - 447   |
| Cumulative respiration       | mg C-CO <sub>2</sub> /kg dm | 348 - 484       | 447 - 641   | 240 - 528   | 305 - 962   | 173 - 235   | 414 - 572   | 270 - 975   | 531 - 1128  |
| Microbial biomass            | mg C/kg dm                  | 79 - 329        | 200 - 360   | 140 - 280   | 120 - 340   | 90 - 167    | 200 - 400   | 120 - 340   | 100 - 340   |
